# Supplementary material
Source: PubMed Central journal article supplement (PMC6650718)
Supplement: rspb20191182supp1.pdf [file rspb20191182supp1.pdf]

## Electronic Supplementary Material (ESM)

### To see or not to see: Molecular evolution of the rhodopsin visual pigment in neotropical electric fishes

DOI 10.1098/rspb.2019.1182

Alexander Van Nynatten<sup>1,2</sup>, Francesco H Janzen<sup>3,4</sup>, Kristen Brochu<sup>5</sup>, Javier A Maldonado-Ocampo<sup>6</sup>, William GR Crampton<sup>7</sup>, Belinda SW Chang<sup>1,8,9</sup>, Nathan R Lovejoy<sup>1,2,8</sup>

<sup>1</sup>Department of Cell and Systems Biology, University of Toronto, Toronto, ON, Canada M5S 3G5

<sup>2</sup>Department of Biological Sciences, University of Toronto Scarborough, Toronto, ON, Canada M1C 1A4

<sup>3</sup> Department of Biology, University of Ottawa, Ottawa, ON, Canada K1N 6N5

<sup>4</sup>Canadian Museum of Nature, Ottawa, ON, Canada K1P 6P4

<sup>5</sup>Department of Entomology, Penn State University, University Park, PA, USA 16802

<sup>6</sup>Laboratorio de Ictiología, Unidad de Ecología y Sistemática -UNESIS-, Departamento de Biología, Facultad de Ciencias, Pontificia Universidad Javeriana, Bogotá, Colombia

<sup>7</sup>Department of Biology, University of Central Florida, Orlando, FL, USA 32816

<sup>8</sup>Department of Ecology and Evolutionary Biology, University of Toronto, Toronto, ON, Canada M5S 3B2

<sup>9</sup>Centre for the Analysis of Genome Evolution and Function, University of Toronto, Toronto, ON, Canada M5S 3B2

Authors for correspondence: Belinda SW Chang – [belinda.chang@utoronto.ca](mailto:belinda.chang@utoronto.ca), Nathan R Lovejoy – [lovejoy@utsc.utoronto.ca](mailto:lovejoy@utsc.utoronto.ca)

## Supplementary Methods

We amplified and sequenced rhodopsin from 147 gymnotiform species (**table S4**) using forward and reverse primers Rh193F (CNTATGAATAYCCTCAGTACTACC) and Rh1073R (CCRCAGCACARCGTGGTGATCATG) from [1]. Each amplification reaction contained 1X mixed Taq buffer, 2.5 mM MgCl<sub>2</sub>, 0.8 mM dNTPs, 0.5 μM of each primer, 0.05 U of Taq DNA polymerase, recombinant, approximately 20-30 ng of template DNA extract, and enough sterile, nuclease-free water to adjust to the final reaction volume of 30 μL. Touchdown PCR cycling conditions for rhodopsin included an initial heating to 94°C for 4 min, then 6 cycles of DNA denaturation at 95°C for 30s, primer annealing at 54°C for 30s (decreasing by 1°C each cycle), and DNA extension at 72°C for 1 min. Once completed, a second series of heating cycles took place with 34 cycles of DNA denaturation at 95°C for 30s, primer annealing at 48°C for 30s, and DNA extension at 72°C for 1 min. A final extension phase at 72°C for 5 min took place at the end of the cycling program.

The gymnotiform dataset was aligned using the DECIPHER package in R [2], and a rhodopsin gene tree was generated using PhyML [3] using the best fitting nucleotide substitution model, HKY + I + G, as determined by ModelFinder [4] (**figure S2**). Support for each node was determined by 100 bootstrap replicates in PhyML.

We downloaded sequences from Genbank to generate a large rhodopsin dataset using BlastPhyME [5], and we pruned it to consist only of rhodopsin sequences belonging to species represented in the robust multi-gene species tree generated in [6], keeping all sequences longer than 700 bp for characiphysian fishes but only representative species for other major vertebrate lineages spanning Gnathostomata for computational tractability (**table S5**). We used the topology from [6] (**figure S3**) for subsequent analyses.

Random-sites models in PAML (M0, M1a and M2a) have one to three site classes respectively [7]. M2a has one site class where  $d_N/d_S$  can exceed one. Support for positive selection ( $d_N/d_S > 1$ ) is tested by comparing the fit of M2a to M1a. Models M7 and M8 are an extension of M1a and

M2a with ten site classes with  $d_N/d_S$  estimates defined by a beta distribution [7]. The Branch-sites test was used to compare  $d_N/d_S$  estimates for the branch leading to the gymnotiform clade with the rest of the tree [8]. This model allows positive selection at a subset of sites only on the selected branch or clade (herein called the foreground) and its fit is compared to a nested null model assuming no positive selection by fixing the  $d_N/d_S$  estimate for the foreground to equal one [8]. Clade models C and D allow  $d_N/d_S$  to differ in a subset of sites in pre-determined phylogenetic partitions, but does not restrict the estimate to be greater than one [9]. The fit of these models were compared with nested null models M2aREL and M3 where the  $d_N/d_S$  estimate for the divergent site class in CmC and CmD is collapsed to uniformity across the phylogeny. We used clade models to compare  $d_N/d_S$  in gymnotiform rhodopsin with other vertebrates using the vertebrate rhodopsin dataset. We also used clade models to compare  $d_N/d_S$  among gymnotiform lineages, using the gymnotiform rhodopsin dataset. We partitioned clades by electric organ discharge (EOD) type: we partitioned by wave-type and pulse-type EODs, and also compared the electric eel (able to produce high-voltage EODs) with all other gymnotiform species (**Figure S2**). FUBAR, RELAX and the adaptive branch-site REL (aBSREL) models were accessed through the Datamonkey webserver [10-14]. RELAX was used to test if selection pressures have relaxed or intensified on the gymnotiform clade with cypriniforms used as the reference. The aBSREL model was used on a dataset comprised only of gymnotiforms without the specification of any foreground lineage. Sites under positive selection were identified using Bayes Empirical Bayes [15]. Ancestral reconstructions were reconstructed in PAML [16] using the best fitting empirical amino acid substitution model, mtZOA+I+G4, for the 50 species vertebrate dataset and the 147 species Gymnotiformes dataset as determined by ModelFinder [4]. Outgroups were included in ancestral reconstructions for the gymnotiforms dataset to help polarize the amino acid identities in gymnotiforms (see **figure S2**). Ancestral amino acid sequences were also inferred from ancestral codon sequences reconstructed using model m3 in PAML. Amino acid substitutions were modelled onto the rhodopsin meta II active-state structure [17] using UCSF Chimera [18].

**Table S1. PAML analyses of the gymnotiform rhodopsin dataset.**

| Model               | np  | lnL      | Parameter Estimates: $d_s/d_s$ (proportion of sites):<br>background $d_s/d_s$ / foreground $d_s/d_s$ | Null     | LRT    | p value  |
|---------------------|-----|----------|------------------------------------------------------------------------------------------------------|----------|--------|----------|
| m0                  | 293 | -8566.72 | 0.03(1.00)                                                                                           |          |        |          |
| m1a                 | 294 | -8393.80 | 0.01(0.96) 1.00(0.04)                                                                                | m0       | 345.84 | < 0.0001 |
| m2a                 | 296 | -8393.80 | 0.01(0.96) 1.00(0.04) 27.15(0.00)                                                                    | m1a      | 0      | 1.0000   |
| m3 (2 site classes) | 295 | -8283.06 | 0.00(0.91) 0.25(0.09)                                                                                |          |        |          |
| m2aREL              | 296 | -8280.60 | 0.00(0.90) 1.00(0.01) 0.21(0.09)                                                                     | m3 (ns2) | 4.92   | 0.0227   |
| M3                  | 297 | -8267.28 | 0.00(0.88) 0.10(0.08) 0.38(0.05)                                                                     | M2aREL   | 26.64  | < 0.0001 |
| m7                  | 294 | -8272.85 | p = 0.07, q = 1.39                                                                                   |          |        |          |
| m8                  | 296 | -8272.85 | p = 0.07, q = 1.39, 2.74(0.00)                                                                       | m7       | 0      | 1.0000   |

**Partitioned models based on electric organ discharge (EOD)****High-voltage EOD**

|                    |     |          |                                                       |                     |      |        |
|--------------------|-----|----------|-------------------------------------------------------|---------------------|------|--------|
| Branch site (null) | 295 | -8393.73 | 0.01(0.96) 1.00(0.04) 0.01/1.00(0.00) 1.00/1.00(0.00) |                     |      |        |
| Branch site        | 296 | -8393.73 | 0.01(0.96) 1.00(0.04) 0.01/1.00(0.00) 1.00/1.00(0.00) | Branch site (null)  | 0    | 1.0000 |
| CmC                | 297 | -8280.01 | 0.00(0.90) 1.00(0.01) 0.21/0.10(0.09)                 | m2aREL              | 1.18 | 0.2774 |
| CmD                | 298 | -8266.14 | 0.00(0.88) 0.38(0.05) 0.10/0.02(0.07)                 | m3 (3 site classes) | 2.28 | 0.1307 |

**Wave-type EOD**

|                    |     |          |                                                       |                     |      |        |
|--------------------|-----|----------|-------------------------------------------------------|---------------------|------|--------|
| Branch site (null) | 296 | -8393.73 | 0.01(0.96) 1.00(0.04) 0.01/1.00(0.00) 1.00/1.00(0.00) |                     |      |        |
| Branch site        | 296 | -8393.73 | 0.01(0.96) 1.00(0.04) 0.01/1.00(0.00) 1.00/1.00(0.00) | Branch site (null)  | 0    | 1.0000 |
| CmC                | 297 | -8280.00 | 0.00(0.90) 1.00(0.01) 0.23/0.18(0.09)                 | m2aREL              | 1.2  | 0.2733 |
| CmD                | 298 | -8267.12 | 0.00(0.88) 0.05(0.38) 0.09/0.11(0.08)                 | m3 (3 site classes) | 0.32 | 0.5716 |

Note: lnL, ln likelihood; LRT, likelihood ratio test result; Br-site, Branch-site; EOD, Electric Organ Discharge

**Table S2. PAML analyses of the vertebrate rhodopsin dataset.**

| Model                                                                                      | np  | lnL       | Parameter Estimates: $d_N/d_S$ (proportion of sites):<br>background $d_N/d_S$ / foreground $d_N/d_S$ | Null              | LRT       | p value          |
|--------------------------------------------------------------------------------------------|-----|-----------|------------------------------------------------------------------------------------------------------|-------------------|-----------|------------------|
| M0                                                                                         | 99  | -14551.75 | 0.05(1.00)                                                                                           |                   |           |                  |
| M1                                                                                         | 100 | -14345.03 | 0.04(0.93), 1.00(0.07)                                                                               | m0                | 413.44    | < 0.0001         |
| M2                                                                                         | 102 | -14345.03 | 0.04(0.93), 1.00(0.03), 1.00(0.04)                                                                   | m1                | 0         | 1.0000           |
| m7                                                                                         | 100 | -13947.32 | p = 0.24, q = 3.07                                                                                   |                   |           |                  |
| m8a                                                                                        | 101 | -13945.23 | p = 0.25, q = 3.50                                                                                   |                   |           |                  |
| m8                                                                                         | 102 | -13945.23 | p = 0.26, q = 3.50 1.00(0.01)                                                                        | m7<br>m8a         | 4.18<br>0 | 0.1237<br>1.0000 |
| M2aREL                                                                                     | 102 | -14001.94 | 0.01(0.73), 1.00(0.01), 0.17(0.26)                                                                   |                   |           |                  |
| m3                                                                                         | 103 | -13959.18 | 0.01(0.64), 0.10(0.28), 0.36(0.08)                                                                   |                   |           |                  |
| <b>Partitioned models with Gymnotiform species separate from other vertebrate lineages</b> |     |           |                                                                                                      |                   |           |                  |
| <b>Gymnotiformes branch</b>                                                                |     |           |                                                                                                      |                   |           |                  |
| Branch Site (null)                                                                         | 101 | -14342.37 | 0.04(0.90), 1.00(0.07), 0.04/1.00(0.03), 1.00/1.00(0.00)                                             |                   |           |                  |
| Branch Site                                                                                | 102 | -14340.37 | 0.04(0.91), 1.00(0.07), 0.04/83.14(0.02), 1.00/83.14(0.00)                                           | BrS null          | 4         | 0.0455           |
| CmC                                                                                        | 103 | -14001.94 | 0.01(0.73), 1.00(0.01), 0.17/0.17(0.26)                                                              | M2aREL            | 0         | 1.0000           |
| CmD                                                                                        | 104 | -13959.02 | 0.01(0.64), 0.10(0.28), 0.36/0.26(0.08)                                                              | m3                | 0.32      | 0.5716           |
| <b>Gymnotiformes Clade</b>                                                                 |     |           |                                                                                                      |                   |           |                  |
| Branch Site (null)                                                                         | 101 | -14340.81 | 0.04(0.92), 1.00(0.07), 0.04/1.00(0.01), 1.00/1.00(0.00)                                             |                   |           |                  |
| Branch Site                                                                                | 102 | -14340.59 | 0.04(0.92), 1.00(0.07), 0.04/1.79(0.00), 1.00/1.79(0.00)                                             | BrS null          | 0.44      | 0.5071           |
| CmC                                                                                        | 103 | -13988.66 | 0.01(0.72), 1.00(0.01), 0.18/0.08(0.27)                                                              | M2aREL            | 26.56     | < 0.0001         |
| CmD                                                                                        | 104 | -13951.80 | 0.01(0.63), 0.09(0.26), 0.33/0.12(0.11)                                                              | m3                | 14.76     | < 0.0001         |
| <b>Gymnotiformes branch and clade</b>                                                      |     |           |                                                                                                      |                   |           |                  |
| CmC                                                                                        | 104 | -13988.58 | 0.01(0.72), 1.00(0.01), 0.19/0.16/0.08(0.27)                                                         | M2aREL            | 26.72     | < 0.0001         |
| CmD                                                                                        | 105 | -13951.56 | 0.01(0.63), 0.09(0.26), 0.34/0.23/0.12(0.11)                                                         | m3                | 15.24     | 0.0001           |
| <b>Cypriniformes clade</b>                                                                 |     |           |                                                                                                      |                   |           |                  |
| CmC                                                                                        | 103 | -14001.45 | 0.01(0.73) 1.00(0.01) 0.18/0.16(0.26)                                                                | M2aREL            | 0.98      | 0.3222           |
| CmD                                                                                        | 104 | -13958.94 | 0.01(0.64) 0.36(0.08) 0.10/0.09(0.28)                                                                | m3                | 0.48      | 0.4884           |
| <b>Gymnotiformes and Cypriniformes clade</b>                                               |     |           |                                                                                                      |                   |           |                  |
| CmC                                                                                        | 104 | -13987.62 | 0.01(0.72) 1.00(0.01) 0.20/0.09/0.16(0.27)                                                           | M2aREL            | 28.64     | < 0.0001         |
| CmD                                                                                        | 105 | -13950.85 | 0.01(0.64) 0.10(0.27) 0.40/0.16/0.32(0.09)                                                           | m3                | 16.66     | 0.0002           |
|                                                                                            |     |           |                                                                                                      | Gymnotiformes CmC | 2.08      | 0.1492           |
|                                                                                            |     |           |                                                                                                      | Gymnotiformes CmD | 1.90      | 0.1675           |
|                                                                                            |     |           |                                                                                                      | Cypriniformes CmC | 27.66     | < 0.0001         |
|                                                                                            |     |           |                                                                                                      | Cypriniformes CmD | 23.24     | < 0.0001         |

Note: lnL, ln likelihood; LRT, likelihood ratio test result; CmC, Clade model C; CmD, Clade model D

**Table S3. Ancestral amino acid and codon reconstructions at select nodes in the vertebrate rhodopsin dataset.**

| Branch            | Substitution | PPi          | PPf          | Method       |
|-------------------|--------------|--------------|--------------|--------------|
| 6 -> 7            | V209I        | 0.529        | 0.554        | aa           |
| 7 -> 8            | I209C        | 0.554        | 0.514        | aa           |
| 9 -> 10           | C209A        | 0.514        | 1.000        | aa           |
| 7 -> 8            | V209S        | 0.488        | 0.605        | codon        |
| 9 -> 10           | S209A        | 0.605        | 1.000        | codon        |
| 6 -> 7            | S213L        | 0.897        | 0.753        | aa           |
| 4 -> 5            | I213T        | 0.762        | 0.899        | codon        |
| 7 -> 8            | T213L        | 0.880        | 0.999        | codon        |
| 7 -> 8            | I214T        | 0.999        | 1.000        | aa           |
| 7 -> 8            | I214T        | 0.999        | 0.996        | codon        |
| 9 -> 10           | L216T        | 1.000        | 1.000        | aa           |
| 9 -> 10           | L216T        | 1.000        | 0.999        | codon        |
| <b>3 -&gt; 4</b>  | <b>I217F</b> | <b>0.989</b> | <b>0.647</b> | <b>aa</b>    |
| <b>7 -&gt; 8</b>  | <b>I217F</b> | <b>0.997</b> | <b>0.996</b> | <b>codon</b> |
| 3 -> 4            | V218I        | 0.99         | 0.895        | aa           |
| 9 -> 10           | I218T        | 0.999        | 1.000        | aa           |
| 3 -> 4            | V218I        | 0.929        | 0.865        | codon        |
| 9 -> 10           | I218T        | 1.000        | 0.999        | codon        |
| 9 -> 10           | T220C        | 1.000        | 1.000        | aa           |
| <b>4 -&gt; 5</b>  | <b>F220T</b> | <b>0.728</b> | <b>0.928</b> | <b>codon</b> |
| <b>9 -&gt; 10</b> | <b>T220C</b> | <b>0.984</b> | <b>1.000</b> | <b>codon</b> |
| 3 -> 4            | T229A        | 0.999        | 0.999        | aa           |
| 6 -> 7            | A229T        | 1.000        | 0.990        | aa           |
| 3 -> 4            | T229A        | 1.000        | 0.966        | codon        |
| 6 -> 7            | A229T        | 0.967        | 0.968        | codon        |
| 9 -> 10           | I256V        | 0.938        | 1.000        | aa           |
| 9 -> 10           | I256V        | 0.966        | 0.999        | codon        |
| <b>4 -&gt; 5</b>  | <b>V258F</b> | <b>0.998</b> | <b>0.997</b> | <b>aa</b>    |
| <b>4 -&gt; 5</b>  | <b>V258F</b> | <b>0.995</b> | <b>0.964</b> | <b>codon</b> |
| 3 -> 4            | S260A        | 0.953        | 0.552        | aa           |
| 3 -> 4            | S260A        | 0.841        | 0.802        | codon        |
| 7 -> 8            | F261Y        | 0.998        | 1.000        | aa           |
| 7 -> 8            | F261Y        | 0.998        | 1.000        | codon        |
| 7 -> 8            | I263V        | 0.811        | 0.995        | codon        |
| 5 -> 6            | V266L        | 0.599        | 0.998        | aa           |
| 4 -> 5            | V266L        | 0.602        | 0.565        | codon        |
| 9 -> 10           | S270H        | 1.000        | 1.000        | aa           |
| 9 -> 10           | S270H        | 0.999        | 0.999        | codon        |
| 7 -> 8            | V271T        | 0.999        | 0.765        | aa           |
| 7 -> 8            | V271T        | 0.996        | 0.685        | codon        |
| 1 -> 2            | F273W        | 0.984        | 0.996        | aa           |
| 1 -> 2            | F273W        | 0.878        | 1.000        | codon        |
| 7 -> 8            | Y274W        | 0.997        | 0.771        | aa           |
| 7 -> 8            | Y274W        | 0.998        | 0.490        | codon        |

Note: PPi, best supported (highest posterior probability) amino acid identity in node i; PPf, best supported amino acid identity in node f; Bold sites discussed in manuscript, Branches match those labelled in figure 1 with the first label representing node I and the second node f. mtZOA+I+G used for amino acid reconstructions and M3 used for codon reconstructions.

**Tables S4. Voucher and Genbank accession numbers for Gymnotiform rhodopsin sequences generated for this study**

| <b>Species</b>                       | <b>ID</b> | <b>Voucher</b> | <b>Accession #</b> |
|--------------------------------------|-----------|----------------|--------------------|
| <i>Adontosternarchus balaenops</i>   | 2612      | UF 116559      | MN031442.1         |
| <i>Adontosternarchus clarkae</i>     | 2906      | MCP 39341      | MN031445.1         |
| <i>Adontosternarchus clarkae</i>     | 8673      | INPA 28867     | MN031443.1         |
| <i>Adontosternarchus nebulosus</i>   | 2892      | MCP 39313      | MN031446.1         |
| <i>Adontosternarchus nebulosus</i>   | 8679      | NA             | MN031444.1         |
| <i>Akawaio penak</i>                 | 8796      | ROM 83884      | MN031447.1         |
| <i>Apteronotus albifrons</i>         | 7301      | MNRJ 33616     | MN031448.1         |
| <i>Apteronotus anu</i>               | 8703      | NA             | MN031449.1         |
| <i>Apteronotus apurensis</i>         | 8688      | UNELLEZ 41     | MN031450.1         |
| <i>Apteronotus bonapartii</i>        | 2914      | NA             | MN031451.1         |
| <i>Apteronotus eschmeyeri</i>        | 4001      | IAvHP 7806     | MN031452.1         |
| <i>Apteronotus galvisi</i>           | 8700      | IAvHP-8635     | MN031453.1         |
| <i>Apteronotus leptorhynchus</i>     | 8704      | IAvHP 9682     | MN031454.1         |
| <i>Apteronotus macrolepis</i>        | 7110      | NA             | MN031455.1         |
| <i>Apteronotus magdalenensis</i>     | 4009      | IAvHP 7829     | MN031456.1         |
| <i>Apteronotus mariae</i>            | 2813      | IAvHP 7812     | MN031457.1         |
| <i>Archolaemus luciae</i>            | 11857     | ZUEC 15782     | MN031459.1         |
| <i>Brachyhypopomus alberti</i>       | 7046      | CBF 10278      | MN031460.1         |
| <i>Brachyhypopomus batesi</i>        | 2414      | MCP 45312      | MN031461.1         |
| <i>Brachyhypopomus beebei</i>        | 6967      | UF 177358      | MN031462.1         |
| <i>Brachyhypopomus belindae</i>      | 2132      | MCP 45431      | MN031463.1         |
| <i>Brachyhypopomus bennetti</i>      | 2136      | MCP 45255      | MN031464.1         |
| <i>Brachyhypopomus bombilla</i>      | 9104      | UFRGS 10561    | MN031465.1         |
| <i>Brachyhypopomus brevirostris</i>  | 7019      | UF 177359      | MN038185.1         |
| <i>Brachyhypopomus diazae</i>        | 305       | UF174334       | MN031467.1         |
| <i>Brachyhypopomus draco</i>         | 9101      | UFRGS 14562    | MN031468.1         |
| <i>Brachyhypopomus flavipomus</i>    | 2141      | MCP 45265      | MN031469.1         |
| <i>Brachyhypopomus hamiltoni</i>     | 7234      | MCP 45681      | MN031470.1         |
| <i>Brachyhypopomus occidentalis</i>  | 8780      | NA             | MN031472.1         |
| <i>Brachyhypopomus palenque</i>      | 2433      | UF 148572      | MN031473.1         |
| <i>Brachyhypopomus pinnicaudatus</i> | 2121      | MCP 45281      | MN031474.1         |
| <i>Brachyhypopomus provenzanoi</i>   | 2365      | UF 177347      | MN031475.1         |
| <i>Brachyhypopomus regani</i>        | 7040      | UMSS 7038      | MN031476.1         |
| <i>Brachyhypopomus sp. 1</i>         | 10344     | NA             | MN031477.1         |
| <i>Brachyhypopomus sp. 2</i>         | 11994     | NA             | MN031478.1         |
| <i>Brachyhypopomus sp. 3</i>         | 11999     | NA             | MN031479.1         |
| <i>Brachyhypopomus sp. 4</i>         | 11995     | NA             | MN031480.1         |
| <i>Brachyhypopomus sp. 5</i>         | 11997     | MCP 49410      | MN031466.1         |
| <i>Brachyhypopomus sp. 6</i>         | 6966      | UF 177365      | MN031471.1         |
| <i>Brachyhypopomus sullivanii</i>    | 7039      | UF 177341      | MN031481.1         |
| <i>Brachyhypopomus verduii</i>       | 2254      | UF 148520      | MN031482.1         |
| <i>Brachyhypopomus walteri</i>       | 7048      | CBF 10257      | MN031483.1         |
| <i>Compsaraia compsa</i>             | 8720      | INPA 28876     | MN031484.1         |

|                                      |       |                |            |
|--------------------------------------|-------|----------------|------------|
| <i>Compsaraia samueli</i>            | 11036 | ANSP 182209    | MN031485.1 |
| <i>Distocyclus conirostris</i>       | 7306  | INPA 28879     | MN031486.1 |
| <i>Eigenmannia sp. 1</i>             | 10964 | ANSP 194529    | MN031487.1 |
| <i>Electrophorus electricus</i>      | 9793  | NA             | MN031488.1 |
| <i>Electrophorus sp. 1</i>           | 2026  | MZUSP 103219   | MN031489.1 |
| <i>Gymnorhamphichthys bogardusae</i> | 10974 | ANSP 199558    | MN031490.1 |
| <i>Gymnorhamphichthys britskii</i>   | 11635 | LBP 3813/22012 | MN031491.1 |
| <i>Gymnorhamphichthys hypostomus</i> | 11851 | NA             | MN031493.1 |
| <i>Gymnorhamphichthys rondoni</i>    | 2154  | MCP 46936      | MN031495.1 |
| <i>Gymnorhamphichthys rondoni</i>    | 10968 | NA             | MN031492.1 |
| <i>Gymnorhamphichthys rondoni</i>    | 11646 | ROM 97536      | MN031494.1 |
| <i>Gymnorhamphichthys rosamariae</i> | 12000 | ANSP 191142    | MN031496.1 |
| <i>Gymnorhamphichthys sp. 1</i>      | 10965 | AUM 48205      | MN031497.1 |
| <i>Gymnotus anguillaris</i>          | 9944  | KU41321        | MN031500.1 |
| <i>Gymnotus anguillaris</i>          | 10545 | ROM 100941     | MN031498.1 |
| <i>Gymnotus bahianus</i>             | 7244  | MZUSP 102898   | MN031499.1 |
| <i>Gymnotus chimarrao</i>            | 11051 | MCP 28583      | MN031501.1 |
| <i>Gymnotus esmeraldas</i>           | 10865 | ZOO.A.V.Pe0310 | MN031502.1 |
| <i>Gymnotus henni</i>                | 8189  | IMCN 4521      | MN031503.1 |
| <i>Gymnotus inaequilabiatus</i>      | 10977 | ANSP 192991    | MN031504.1 |
| <i>Gymnotus javari</i>               | 2020  | UF 122824      | MN031505.1 |
| <i>Gymnotus jonasi</i>               | 2471  | UF 131410      | MN031506.1 |
| <i>Gymnotus obscurus</i>             | 2018  | MZUSP 75157    | MN031507.1 |
| <i>Gymnotus omarorum</i>             | 7093  | AMNH 239656    | MN031508.1 |
| <i>Gymnotus panamensis</i>           | 8210  | STRI-01579     | MN031509.1 |
| <i>Gymnotus pantanal</i>             | 7076  | NA             | MN031510.1 |
| <i>Gymnotus sp. 1</i>                | 10347 | NA             | MN031511.1 |
| <i>Gymnotus sp. 2</i>                | 2091  | AUM 36616      | MN031512.1 |
| <i>Gymnotus sp. 3</i>                | 7109  | UNCAT. MCP     | MN031513.1 |
| <i>Gymnotus sp. 4</i>                | 8761  | MNRJ 33642     | MN031514.1 |
| <i>Gymnotus sp. 5</i>                | 8779  | MNRJ 33630     | MN031515.1 |
| <i>Gymnotus stenoleucus</i>          | 2060  | UF 174329      | MN031516.1 |
| <i>Gymnotus sylvius</i>              | 7240  | MZUSP 100267   | MN031517.1 |
| <i>Gymnotus ucamara</i>              | 1950  | UF 126184      | MN031518.1 |
| <i>Hypopygus lepturus</i>            | 2438  | NA             | MN031519.1 |
| <i>Hypopygus minissimus</i>          | 2336  | UF 175389      | MN031520.1 |
| <i>Hypopygus neblinae</i>            | 2337  | UF 148540      | MN031521.1 |
| <i>Hypopygus nijsseni</i>            | 2216  | MCP 44651      | MN031522.1 |
| <i>Japigny kirschbaum</i>            | 8992  | MHNG 2682.031  | MN031523.1 |
| <i>Megadontognathus kaitukaensis</i> | 10970 | ANSP 195961    | MN031526.1 |
| <i>Melanosternarchus amaru</i>       | 11843 | MUSM 56870     | MN031562.1 |
| <i>Microsternarchus bilineatus</i>   | 2138  | MCP 45480      | MN031527.1 |
| <i>Microsternarchus sp. 1</i>        | 11996 | NA             | MN031528.1 |
| <i>Microsternarchus sp. 2</i>        | 11998 | NA             | MN031529.1 |
| <i>Microsternarchus sp. 3</i>        | 10348 | NA             | MN031530.1 |
| <i>Orthosternarchus tamandua</i>     | 2625  | UF 116562      | MN031531.1 |



|                                       |       |                          |            |
|---------------------------------------|-------|--------------------------|------------|
| <i>Platyurosternarchus macrostoma</i> | 8726  | MNRJ 33614               | MN031532.1 |
| <i>Porotergus duende</i>              | 2916  | MCP 37359                | MN031533.1 |
| <i>Porotergus gymnotus</i>            | 10957 | NA                       | MN031534.1 |
| <i>Porotergus sp. 1</i>               | 11842 | NA                       | MN031458.1 |
| <i>Procerusternarchus pixuna</i>      | 11638 | LBP 7006/34063           | MN031535.1 |
| <i>Racenisia fimbriipinna</i>         | 2340  | UF 177352                | MN031536.1 |
| <i>Rhabdolichops caviceps</i>         | 2883  | MCP 36007                | MN031537.1 |
| <i>Rhabdolichops caviceps</i>         | 8994  | UNELLEZ                  | MN031539.1 |
| <i>Rhabdolichops caviceps</i>         | 10990 | NA                       | MN031538.1 |
| <i>Rhabdolichops eastwardi</i>        | 2104  | MCP 36025                | MN031543.1 |
| <i>Rhabdolichops eastwardi</i>        | 8996  | INPA 28911               | MN031540.1 |
| <i>Rhabdolichops eastwardi</i>        | 9014  | NA                       | MN031541.1 |
| <i>Rhabdolichops electrogrammus</i>   | 2898  | MCP 36029                | MN031544.1 |
| <i>Rhabdolichops electrogrammus</i>   | 9004  | INPA 28863               | MN031542.1 |
| <i>Rhabdolichops jegui</i>            | 9013  | ANSP 189021              | MN031545.1 |
| <i>Rhabdolichops navalha</i>          | 9030  | LFCE 201004210950D_CAB03 | MN031546.1 |
| <i>Rhabdolichops troscheli</i>        | 11853 | MUSM 61963               | MN031547.1 |
| <i>Rhamphichthys apurensis</i>        | 10995 | ANSP 198380              | MN031548.1 |
| <i>Rhamphichthys drepanium</i>        | 11854 | UF 189191                | MN031549.1 |
| <i>Rhamphichthys heleios</i>          | 11855 | UF 189422                | MN031550.1 |
| <i>Rhamphichthys rostratus</i>        | 8825  | INPA 46                  | MN031551.1 |
| <i>Rhamphichthys sp. 1</i>            | 10999 | ANSP 198379              | MN031552.1 |
| <i>Steatogenys duidae</i>             | 2147  | MCP 31958                | MN031553.1 |
| <i>Steatogenys elegans</i>            | 8807  | INPA 28860               | MN031554.1 |
| <i>Steatogenys ocellatus</i>          | 9107  | MUSM 44772               | MN031555.1 |
| <i>Sternarchella calhamazon</i>       | 10981 | ANSP 193103              | MN031556.1 |
| <i>Sternarchella duccis</i>           | 11844 | MUSM 61958               | MN031524.1 |
| <i>Sternarchella orthos</i>           | 2899  | MCP 49436                | MN031558.1 |
| <i>Sternarchella raptor</i>           | 2910  | NA                       | MN031525.1 |
| <i>Sternarchella rex</i>              | 11846 | MUSM 54500               | MN031557.1 |
| <i>Sternarchogiton labiatus</i>       | 11848 | MUSM 61959               | MN031559.1 |
| <i>Sternarchogiton porcinum</i>       | 10980 | ANSP 182319              | MN031560.1 |
| <i>Sternarchogiton preto</i>          | 8732  | INPA 28880               | MN031561.1 |
| <i>Sternarchorhamphus muelleri</i>    | 2103  | MCP 41658                | MN031564.1 |
| <i>Sternarchorhamphus sp. 1</i>       | 8744  | NA                       | MN031563.1 |
| <i>Sternarchorhynchus galibi</i>      | 11037 | ANSP 187155              | MN031566.1 |
| <i>Sternarchorhynchus goeldii</i>     | 2849  | MCP 41643                | MN031567.1 |
| <i>Sternarchorhynchus goeldii</i>     | 8746  | INPA 28873               | MN031565.1 |
| <i>Sternarchorhynchus goeldii</i>     | 10988 | INPA 40463               | MN031569.1 |
| <i>Sternarchorhynchus hagedornae</i>  | 10969 | ANSP 180637              | MN031568.1 |
| <i>Sternarchorhynchus mareikeae</i>   | 11858 | ZUEC 15783               | MN031570.1 |
| <i>Sternarchorhynchus marrerai</i>    | 11013 | ANSP 198345              | MN031571.1 |
| <i>Sternarchorhynchus montanus</i>    | 11849 | MUSM 61960               | MN031572.1 |
| <i>Sternarchorhynchus mormyrus</i>    | 2871  | MCP 41640                | MN031573.1 |
| <i>Sternarchorhynchus retzeri</i>     | 11850 | MUSM 61961               | MN031574.1 |
| <i>Sternarchorhynchus starksi</i>     | 11076 | MCP 47080                | MN031575.1 |

|                                    |       |             |            |
|------------------------------------|-------|-------------|------------|
| <i>Sternarchorhynchus stewarti</i> | 7352  | MUSM 33822  | MN031576.1 |
| <i>Sternarchorhynchus yepezi</i>   | 11014 | ANSP 198401 | MN031577.1 |
| <i>Sternopygus aequilabiatus</i>   | 2820  | IAvHP 7825  | MN031578.1 |
| <i>Sternopygus arenatus</i>        | 9038  | MNRJ 734    | MN031579.1 |
| <i>Sternopygus astrabes</i>        | 2203  | NA          | MN031580.1 |
| <i>Sternopygus branco</i>          | 2108  | MCP 32246   | MN031581.1 |
| <i>Sternopygus dariensis</i>       | 9043  | IAvHP-8477  | MN031584.1 |
| <i>Sternopygus macrurus</i>        | 2112  | UF 122829   | MN031585.1 |
| <i>Sternopygus macrurus</i>        | 9065  | MNRJ 33649  | MN031582.1 |
| <i>Sternopygus macrurus</i>        | 9086  | NA          | MN031583.1 |
| <i>Sternopygus obtusirostris</i>   | 2114  | MCP 32261   | MN031586.1 |
| <i>Sternopygus pejeraton</i>       | 9089  | UNELLEZ     | MN031587.1 |
| <i>Sternopygus xingu</i>           | 11648 | NA          | MN031588.1 |

---

**Table S5. Taxa used in vertebrate rhodopsin dataset, with Genbank accession numbers.**

| <b>Species</b>                             | <b>accession</b> |
|--------------------------------------------|------------------|
| <i>Albulichthys albuloides</i>             | KC690011.1       |
| <i>Amia calva</i>                          | AF137208.1       |
| <i>Callorhynchus milii</i>                 | NM_001292252.1   |
| <i>Chanos chanos</i>                       | FJ197072.1       |
| <i>Ctenopharyngodon idella</i>             | KX224231.1       |
| <i>Danio tinwini</i>                       | JQ614153.1       |
| <i>Danionella mirifica</i>                 | FJ531347.1       |
| <i>Gonorynchus greyi</i>                   | EU409632.1       |
| <i>Gyrinocheilus aymonieri</i>             | EU409663.1       |
| <i>Lefua echigonia</i>                     | FJ197028.1       |
| <i>Lepisosteus oculatus</i>                | XM_006630940.2   |
| <i>Microdevario kubotai</i>                | JQ614189.1       |
| <i>Microrasbora rubescens</i>              | JF966216.1       |
| <i>Minytrema melanops</i>                  | FJ197034.1       |
| <i>Mugil cephalus</i>                      | Y18668.1         |
| <i>Neoceratodus forsteri</i>               | EF526295.1       |
| <i>Oncorhynchus nerka</i>                  | AY214156.1       |
| <i>Acipenser fulvescens</i>                | KX145850.1       |
| <i>Rasbora borapetensis</i>                | HM223982.1       |
| <i>Rasbora pauciperforata</i>              | JQ614284.1       |
| <i>Securicula gora</i>                     | HM224015.1       |
| <i>Sinibotia robusta</i>                   | JN177209.1       |
| <i>Solea solea</i>                         | EU638009.1       |
| <i>Tanichthys micagemmae</i>               | HM224017.1       |
| <i>Umbra limi</i>                          | JN230999.1       |
| <i>Vaillantella maassi</i>                 | FJ197031.1       |
| <i>Zeus faber</i>                          | EU638023.1       |
| <i>Hepsetus odoe</i>                       | JX470079.1       |
| <i>Ameiurus nebulosus</i>                  | KX146011.1       |
| <i>Pygocentrus nattereri</i>               | XM_017683920.1   |
| <i>Diplomystes nahuelbutaensis</i>         | JN230990.1       |
| <i>Hydrolycus armatus</i>                  | JX470081.1       |
| <i>Apteronotus albifrons</i>               | JN230983.1       |
| <i>Sternarchorhynchus stewarti</i> 7352    | MN031576.1       |
| <i>Sternopygus macrurus</i> 2112           | MN031585.1       |
| <i>Eigenmannia virescens</i>               | KX260614.1       |
| <i>Rhabdolichops jegui</i> 9013            | MN031545.1       |
| <i>Electrophorus electricus</i> 9793       | MN031488.1       |
| <i>Brachyhypopomus brevirostris</i> 7019   | MN038185.1       |
| <i>Hypopygus lepturus</i> 2438             | MN031519.1       |
| <i>Rhamphichthys rostratus</i> 8825        | MN031551.1       |
| <i>Gymnorhamphichthys hypostomus</i> 11851 | MN031493.1       |
| <i>Gymnorhamphichthys rondoni</i> 2154     | MN031495.1       |
| <i>Homo sapiens</i>                        | KJ849294.1       |
| <i>Engraulis mordax</i>                    | KT201125.1       |
| <i>Monodelphis domestica</i>               | XM_001366188.2   |
| <i>Xenopus tropicalis</i>                  | NM_001097334.2   |
| <i>Lates microlepis</i>                    | JQ938016.1       |
| <i>Latimeria chalumnae</i>                 | XM_005997817.2   |
| <i>Mus musculus</i>                        | XM_017321493.1   |

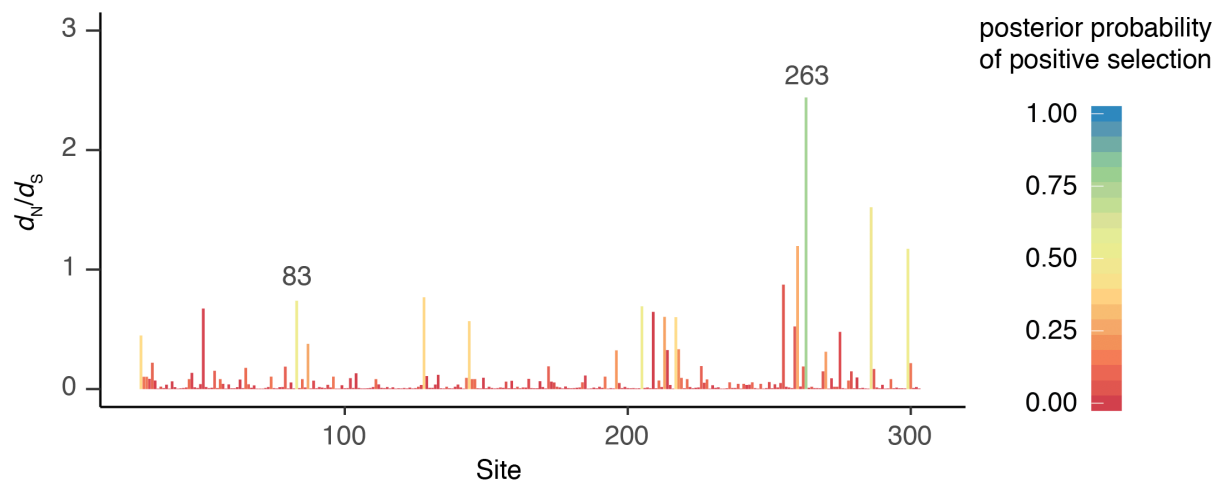

**Figure S1.** Bar chart showing the  $d_N/d_S$  estimates for each site in gymnotiform rhodopsin using FUBAR. Each site is coloured to match the posterior probability of positive selection at that site. Sites with posterior probabilities of positive selection above 0.5 are labelled.

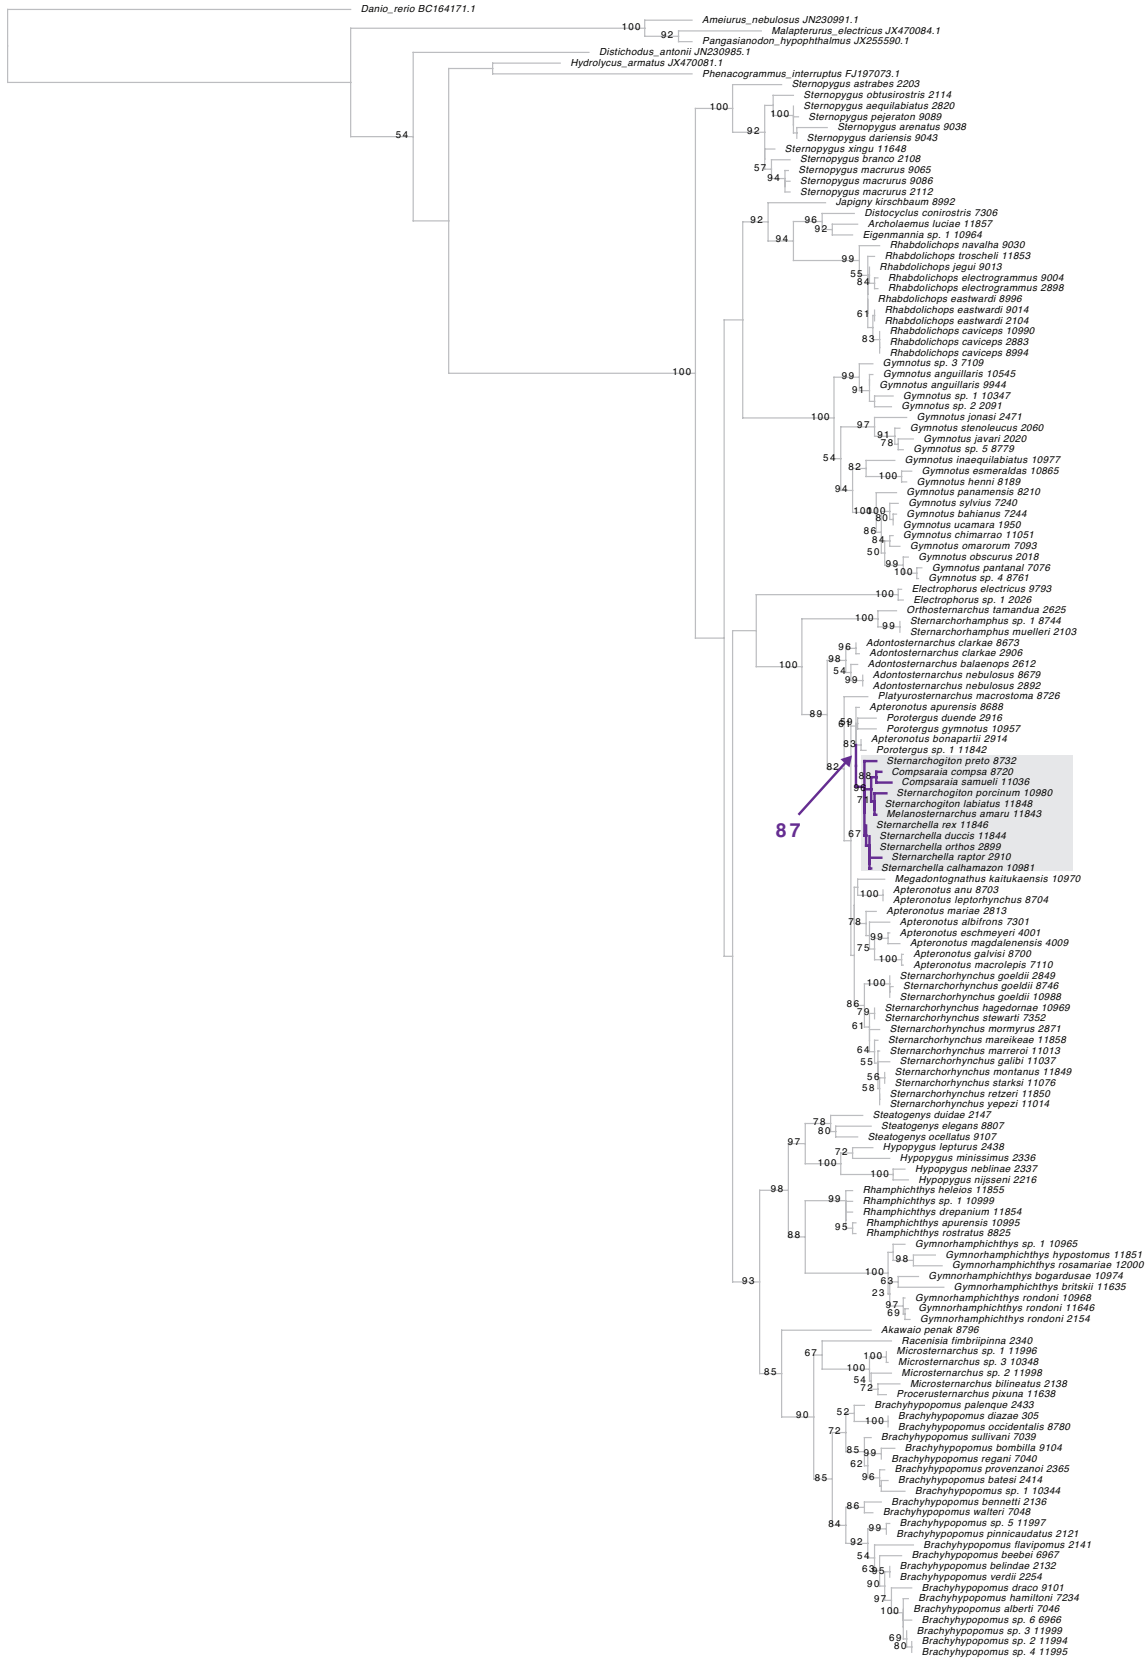

0.1

**Figure S2.** Rhodopsin gene tree for gymnotiforms generated using PhyML. Branch lengths equal to the number of nucleotide substitutions per site. Tree rooted using *Danio rerio*. Bootstrap values shown to the right of each node. Gymnotiform clades using wave-type and pulse type electric organ discharges (EOD) are indicated in blue and red respectively. The high-voltage EOD generating lineage, the electric eel, is indicated with an (*hv*) [19]. Gray box indicates the clade comprised of deep-channel gymnotiforms exhibiting positive selection of rhodopsin.

---

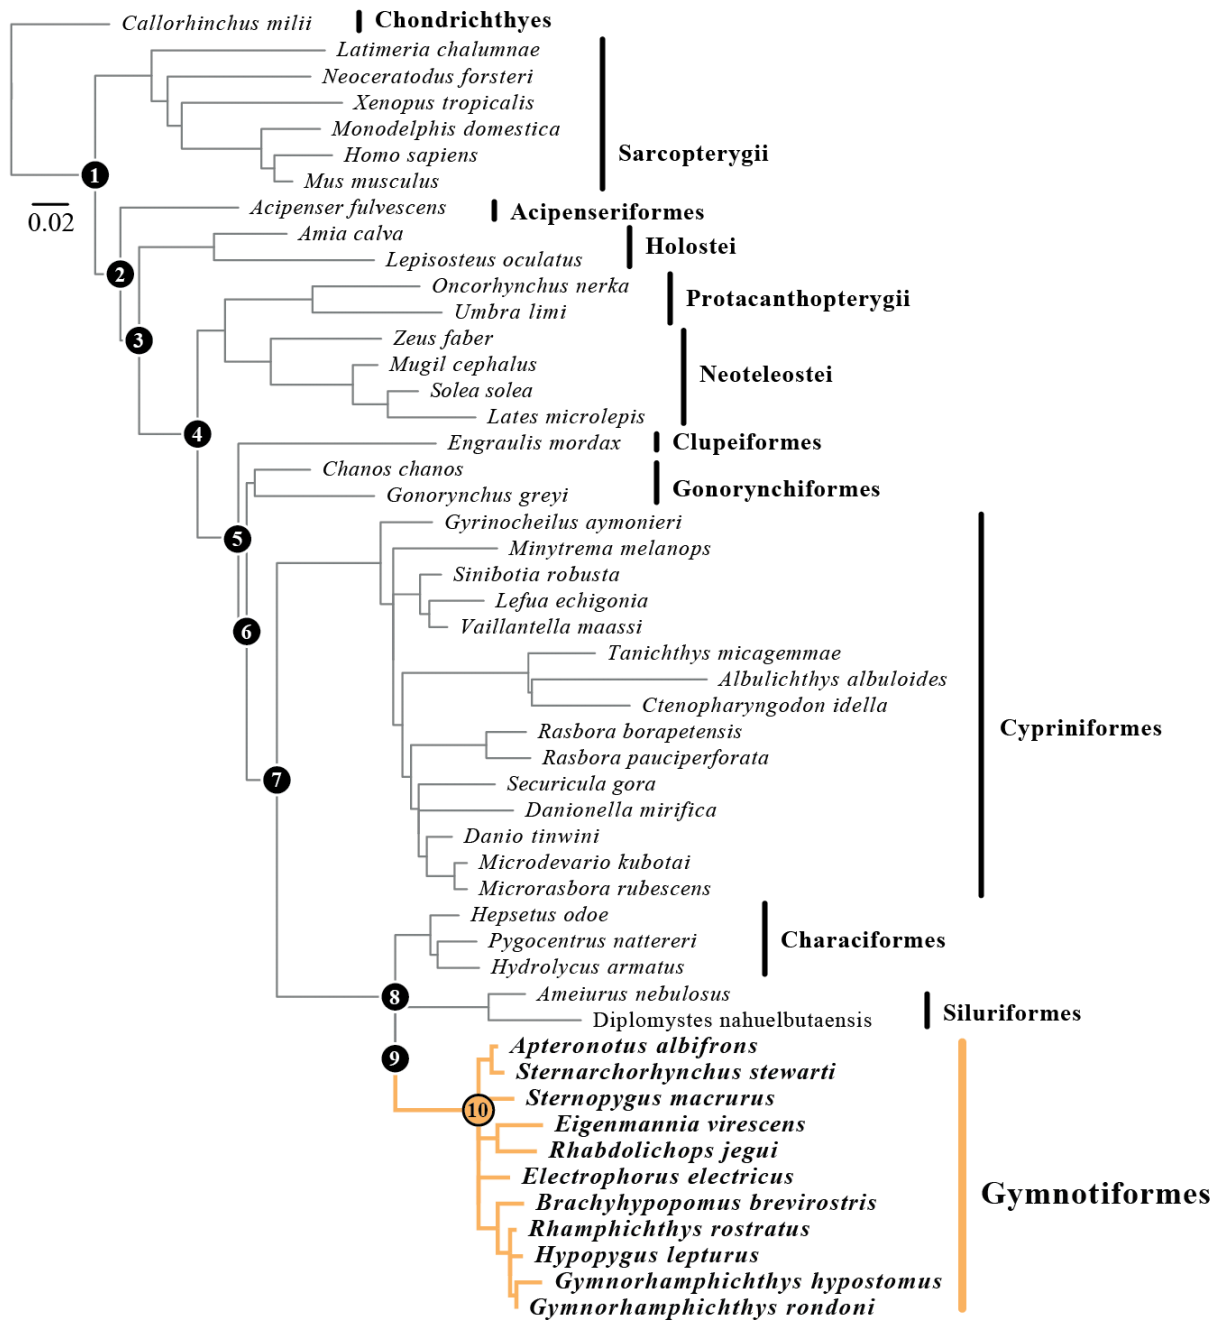

**Figure S3.** Vertebrate tree used to compare the molecular evolution of rhodopsin in gymnotiforms to other vertebrates and reconstruct ancestral sequences. Topology matches the species relationships in the robust multi-gene species tree generated in [5]. Branch lengths scaled by the number of amino acid substitutions per site using the mtZOA+I+G4 model of amino acid evolution. Nodes enumerated from the common ancestor of fishes and humans to the common ancestor of gymnotiforms (see Table S3).

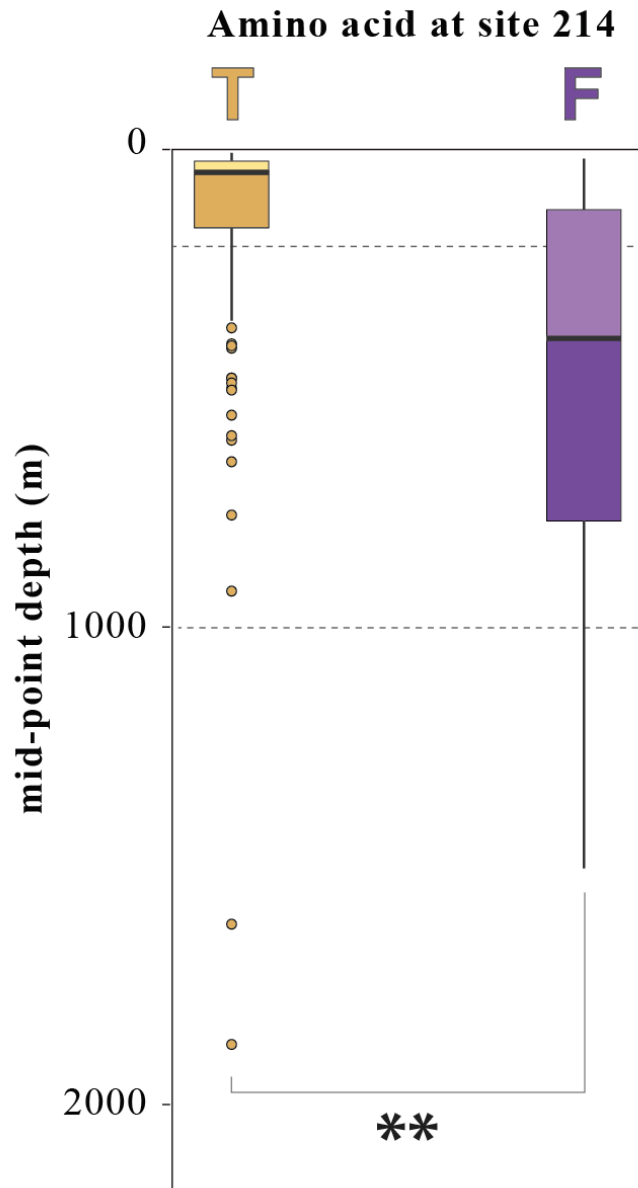

**Figure S4.** Boxplots showing midpoint depths for fishes with different amino acid identities at site 214 (n =169 species). Fish sequences were obtained from Genbank, and depth data were collected using the R Fishbase package [20]. Mesopelagic zone (200-1000m) indicated by dashed lines. \*\* indicates significance ( $p < 0.001$ ) for Mann-Whitney U test.



## Supplementary References

1. Chen, W. J., Lavoué, S. & Mayden, R. L. 2013 Evolutionary origin and early biogeography of otophysan fishes (Ostariophysi: Teleostei). *Evolution* **67**, 2218–2239.
2. Wright, E. S. 2015 DECIPHER: harnessing local sequence context to improve protein multiple sequence alignment. *BMC Bioinform.* **16**, 322.
3. Guindon, S. & Gascuel, O. 2003 A simple, fast, and accurate algorithm to estimate large phylogenies by maximum likelihood. *Syst. Biol.* **52**, 696–704.
4. Kalyaanamoorthy, S., Minh, B. Q., Wong, T. K., Haeseler, von, A. & Jermin, L. S. 2017 ModelFinder: fast model selection for accurate phylogenetic estimates. *Nat. Methods* **14**, 587.
5. Schott, R. K., Gow, D. A. & Chang, B. S. W. 2019 BlastPhyMe: A toolkit for rapid generation and analysis of protein-coding sequence datasets. *bioRxiv*, 059881. (doi:10.1101/059881)
6. Betancur-R, R., Wiley, E. O., Arratia, G., Acero, A., Bailly, N., Miya, M., Lecointre, G. & Orti, G. 2017 Phylogenetic classification of bony fishes. *BMC Evol. Biol.* **17**, 162.
7. Yang, Z., Nielsen, R., Goldman, N. & Pedersen, A.-M. K. 2000 Codon-substitution models for heterogeneous selection pressure at amino acid sites. *Genetics* **155**, 431–449.
8. Yang, Z. & Nielsen, R. 2002 Codon-substitution models for detecting molecular adaptation at individual sites along specific lineages. *Mol. Biol. Evol.* **19**, 908–917.
9. Bielawski, J. P. & Yang, Z. 2004 A maximum likelihood method for detecting functional divergence at individual codon sites, with application to gene family evolution. *J. Mol. Evol.* **59**, 121–132.
10. Wertheim, J. O., Murrell, B., Smith, M. D., Kosakovsky Pond, S. L. & Scheffler, K. 2014 RELAX: detecting relaxed selection in a phylogenetic framework. *Mol. Biol. Evol.* **32**, 820–832.
11. Murrell, B., Moola, S., Mabona, A., Weighill, T., Sheward, D., Kosakovsky Pond, S. L. & Scheffler, K. 2013 FUBAR: a fast, unconstrained bayesian approximation for inferring selection. *Mol. Biol. Evol.* **30**, 1196–1205.
12. Pond, S. L. K. & Muse, S. V. 2005 HyPhy: hypothesis testing using phylogenies. In *Statistical methods in molecular evolution*, pp. 125–181. Springer.
13. Kosakovsky Pond, S. L., Murrell, B., Fourment, M., Frost, S. D., Delport, W. & Scheffler, K. 2011 A random effects branch-site model for detecting episodic diversifying selection. *Mol. Biol. Evol.* **28**, 3033–3043.

14. Pond, S. L. K. & Frost, S. D. 2005 Datamonkey: rapid detection of selective pressure on individual sites of codon alignments. *Bioinformatics* **21**, 2531–2533.
15. Yang, Z., Wong, W. S. & Nielsen, R. 2005 Bayes empirical Bayes inference of amino acid sites under positive selection. *Mol. Biol. Evol.* **22**, 1107–1118.
16. Yang, Z. 2007 PAML 4: phylogenetic analysis by maximum likelihood. *Mol. Biol. Evol.* **24**, 1586–1591.
17. Choe, H.-W., Kim, Y. J., Park, J. H., Morizumi, T., Pai, E. F., Krauss, N., Hofmann, K. P., Scheerer, P. & Ernst, O. P. 2011 Crystal structure of metarhodopsin II. *Nature* **471**, 651.
18. Pettersen, E. F., Goddard, T. D., Huang, C. C., Couch, G. S., Greenblatt, D. M., Meng, E. C. & Ferrin, T. E. 2004 UCSF Chimera—a visualization system for exploratory research and analysis. *J. Comput. Chem.* **25**, 1605–1612.
19. Crampton, W. G. R. (2019). Electroreception, electrogenesis and electric signal evolution. *J. Fish Biol.* **204**(12), 185.
20. Boettiger, C., Lang, D. T. & Wainwright, P. C. 2012 rfishbase: exploring, manipulating and visualizing FishBase data from R. *J. Fish Biol.* **81**, 2030–2039.
